# Supplementary material for: CENP-A and H3 Nucleosomes Display a Similar Stability to Force-Mediated Disassembly
Source: PubMed Central journal article supplement (PMC5098787; doi:10.1371/journal.pone.0165078), 2016-11-07

S5 Fig.

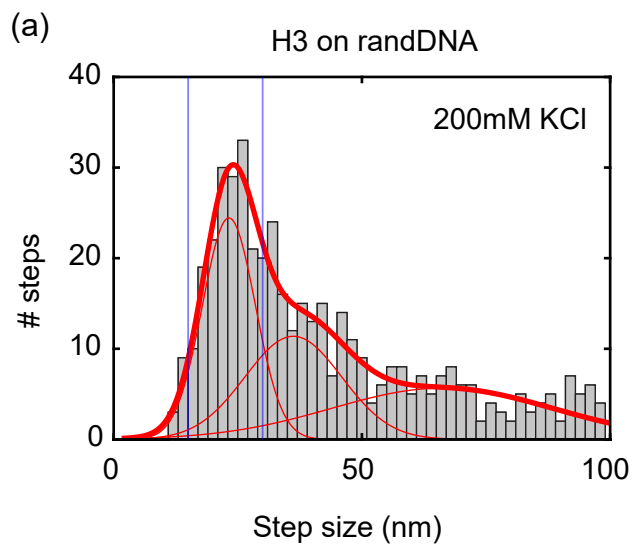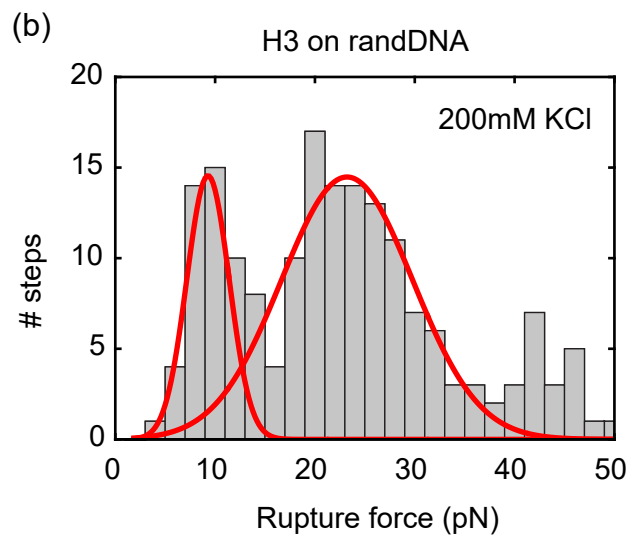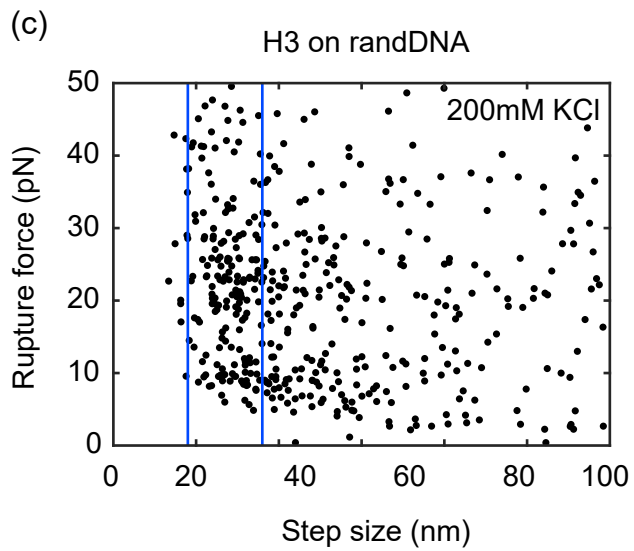

Supplement: pone.0165078.s005.pdf [file pone.0165078.s005.pdf]
