# Supplementary material for: CENP-A and H3 Nucleosomes Display a Similar Stability to Force-Mediated Disassembly
Source: PubMed Central journal article supplement (PMC5098787; doi:10.1371/journal.pone.0165078), 2016-11-07

S8 Fig.

(a)

H3 on randDNA

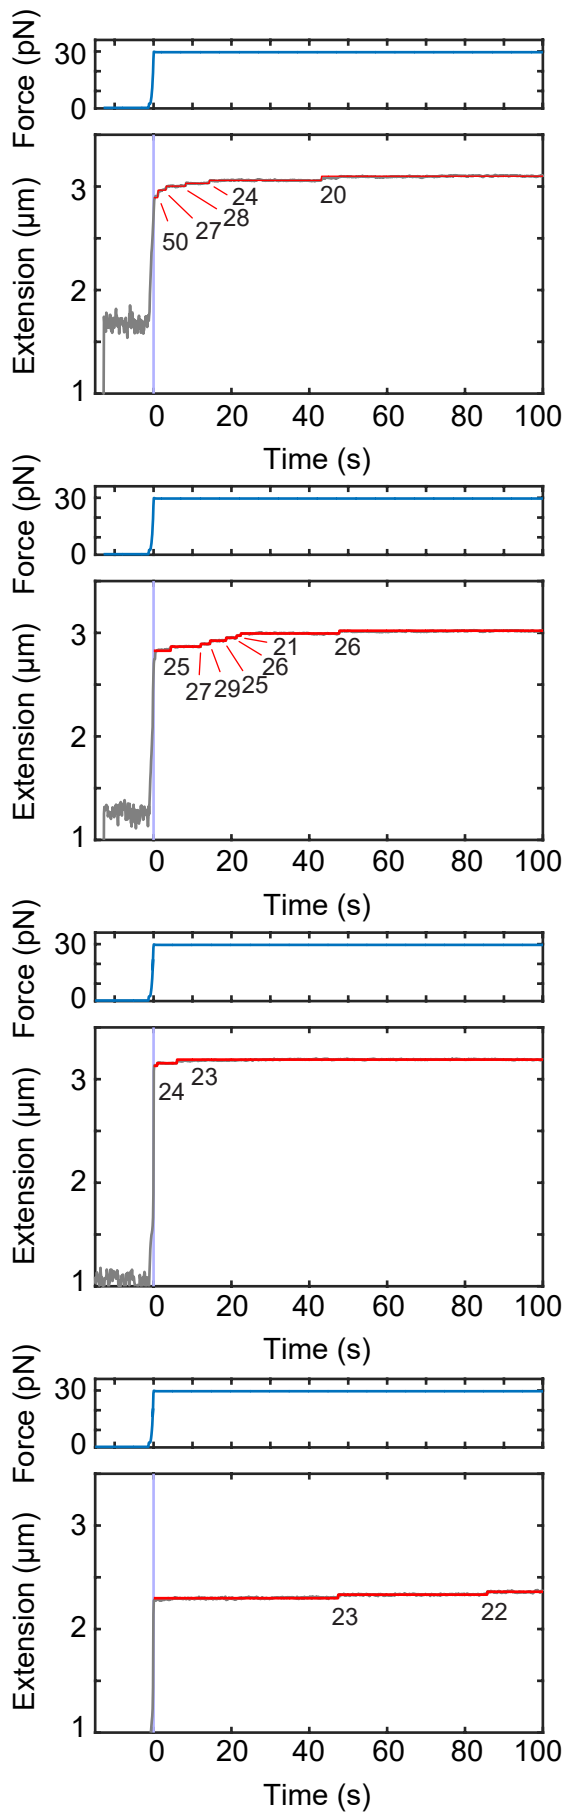

(b)

CENP-A on randDNA

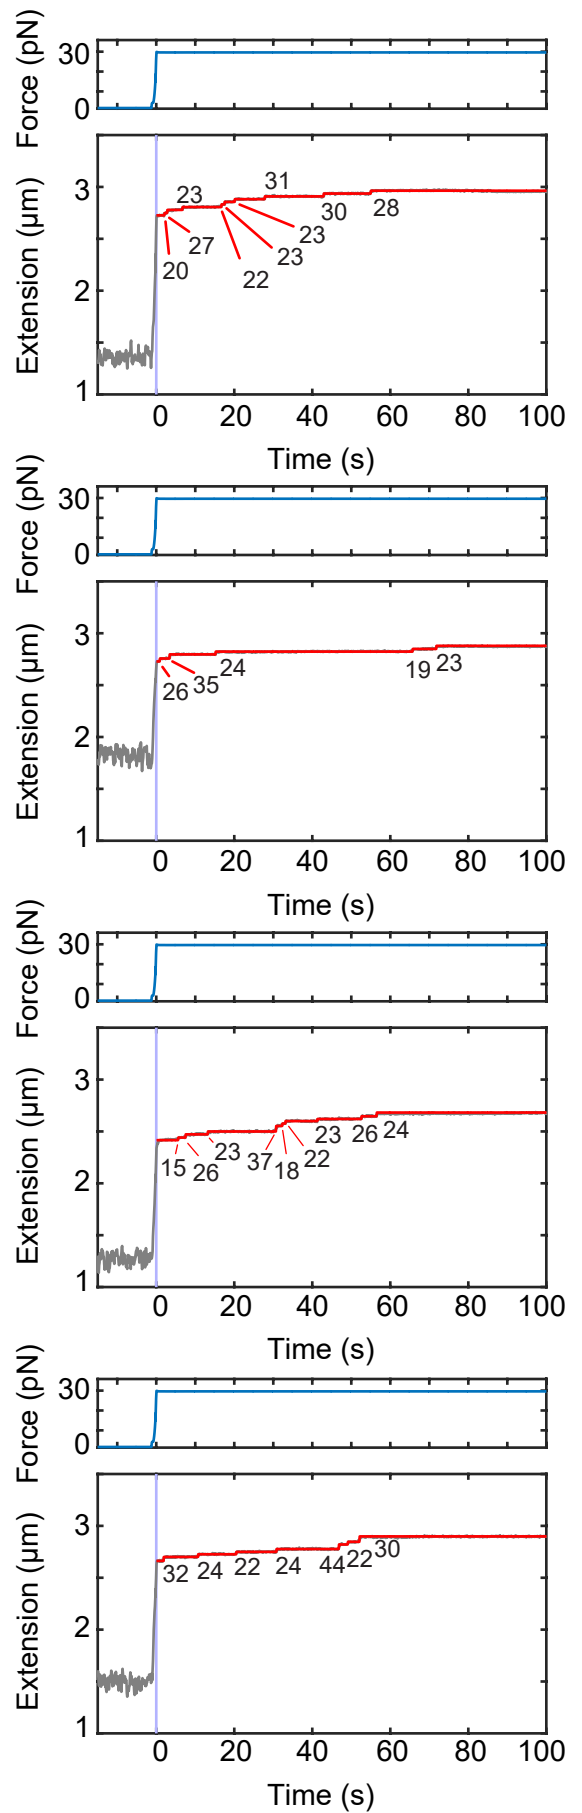

Supplement: pone.0165078.s008.pdf [file pone.0165078.s008.pdf]
