# Supplementary material for: CENP-A and H3 Nucleosomes Display a Similar Stability to Force-Mediated Disassembly
Source: PubMed Central journal article supplement (PMC5098787; doi:10.1371/journal.pone.0165078), 2016-11-07
Supplement: pone.0165078.s013.pdf [file pone.0165078.s013.pdf]

## SUPPLEMENTARY TABLE 1

### Multi-Gaussian fit parameters of step size distribution from force-ramp data in Fig. 2e and 2f

| Protein | DNA         | Peak1 (nm) | Peak2 (nm) | Peak3 (nm) |
|---------|-------------|------------|------------|------------|
| H3*     | Random      |            | 23±4.1     | 38±15      |
| H3      | Centromeric | 13±2.1     | 23±4.9     | 52±20      |
| CA*     | Random      |            | 24±3.9     | 42±19      |
| CA      | Centromeric | 13±1.6     | 22±4.0     | 34±13      |

\* Three-Gaussian peak fitting does not reduce chi-square value comparing to two-Gaussian peak fitting.

\*\* Error bars are standard deviation of the population distribution.
