# Supplementary material for: CENP-A and H3 Nucleosomes Display a Similar Stability to Force-Mediated Disassembly
Source: PubMed Central journal article supplement (PMC5098787; doi:10.1371/journal.pone.0165078), 2016-11-07
Supplement: pone.0165078.s014.pdf [file pone.0165078.s014.pdf]

## SUPPLEMENTARY TABLE 2

### Multi-Gaussian fit parameters of rupture force distribution from force-ramp data in Fig. 2g and 2h

| Protein | DNA         | Peak1 (pN) | Peak2 (pN) |
|---------|-------------|------------|------------|
| H3      | Random      | 15±2.3     | 29±5.4     |
| H3      | Centromeric | 7.8±2.8    | 28±6.2     |
| CA      | Random      | 13±0.5     | 25±4.6     |
| CA      | Centromeric | 13±4.4     | 27±3.2     |

\* Error bars are standard deviation of the population distribution.
