# Supplementary material for: CENP-A and H3 Nucleosomes Display a Similar Stability to Force-Mediated Disassembly
Source: PubMed Central journal article supplement (PMC5098787; doi:10.1371/journal.pone.0165078), 2016-11-07
Supplement: pone.0165078.s015.pdf [file pone.0165078.s015.pdf]

### SUPPLEMENTARY TABLE 3

**Multi-Gaussian fit parameters of step size and rupture force distributions from force-ramp data in Fig. S5**

| Protein       | Peak1      | Peak2     | Peak3    |
|---------------|------------|-----------|----------|
| Step size     | 23±5.3 nm  | 36±9.7 nm | 66±22 nm |
| Rupture force | 9.3±2.1 pN | 23±6.6 pN | -        |

\* Error bars are standard deviation of the population distribution.
