# Supplementary material for: CENP-A and H3 Nucleosomes Display a Similar Stability to Force-Mediated Disassembly
Source: PubMed Central journal article supplement (PMC5098787; doi:10.1371/journal.pone.0165078), 2016-11-07
Supplement: pone.0165078.s016.pdf [file pone.0165078.s016.pdf]

#### SUPPLEMENTARY TABLE 4

**Multi-Gaussian fit parameters of step size distribution from force-ramp data in Fig. 3c-d and S8 Fig.**

| Force (pN) | Protein | DNA         | Peak1 (nm) | Peak2 (nm) | Peak3 (nm) |
|------------|---------|-------------|------------|------------|------------|
| 20         | H3      | Random      | 13±1.8     | 22±2.9     | 42±6.2     |
| 20         | H3      | Centromeric | 13±0.9     | 22±3.6     | 47±7.1     |
| 20         | CA      | Random      | 13±1.9     | 22±3.0     | 42±4.9     |
| 20         | CA      | Centromeric | 14±0.5     | 21±2.8     | 37±6.6     |
| 30         | H3      | Random      | 12±1.8     | 23±2.5     | 34±4.5     |
| 30         | H3      | Centromeric | 13±1.7     | 20±3.0     | 35±4.4     |
| 30         | CA      | Random      | 15±1.1     | 21±3.5     | 39±4.8     |
| 30         | CA      | Centromeric | 13±2.1     | 21±2.7     | 36±4.8     |
| 40         | H3*     | Random      | -          | 18±3.7     | 35±3.9     |
| 40         | H3      | Centromeric | 13±1.0     | 19±2.9     | 39±5.2     |
| 40         | CA      | Random      | 14±1.5     | 20±3.0     | 40±4.9     |
| 40         | CA*     | Centromeric | -          | 21±3.6     | 46±7.5     |

\* Three-Gaussian peak fitting does not reduce chi-square value comparing to two-Gaussian peak fitting.

\*\* Error bars are standard deviation of the population distribution.
