# Supplementary material for: CENP-A and H3 Nucleosomes Display a Similar Stability to Force-Mediated Disassembly
Source: PubMed Central journal article supplement (PMC5098787; doi:10.1371/journal.pone.0165078), 2016-11-07
Supplement: pone.0165078.s017.pdf [file pone.0165078.s017.pdf]

## SUPPLEMENTARY TABLE 5

Single-exponential fit parameters of life-time distribution from force-clamp data in Fig. 3e-g and S10 Fig.

| Protein | DNA         | 20pN   | 30pN   | 40pN   |
|---------|-------------|--------|--------|--------|
| H3      | Random      | 77±6.1 | 32±2.9 | 14±2.1 |
| H3      | Centromeric | 30±4.8 | 19±3.5 | 14±3.6 |
| CA      | Random      | 31±18  | 25±2.7 | 22±6.4 |
| CA      | Centromeric | 41±6.1 | 35±2.9 | 8±3.0  |

\* Error bars are standard deviation of the population distribution.
