# Supplementary material for: CENP-A and H3 Nucleosomes Display a Similar Stability to Force-Mediated Disassembly
Source: PubMed Central journal article supplement (PMC5098787; doi:10.1371/journal.pone.0165078), 2016-11-07
Supplement: pone.0165078.s018.pdf [file pone.0165078.s018.pdf]

## SUPPLEMENTARY TEXT 1

### Sequence of the 7.9kb random DNA (randDNA)

(Ligation site for the biotin labeled DNA fragment)-

GGTCCACATGGTCTGCGGGTTCAGGGTGCACATCTGCCGCCAGGTCCGCGATGCCTGCGGGTTCAGGGTGTACGTC  
AGCCGTCACACTACTATGGGAGCCATTGGCTCGTAGATCGAGTCGATGTCACACGACTGCAAACCTGGGTAGCGACAT  
GGTATCGCTGGCAGTGGAAGACGAGTCGGTGGTCCAGTCCAAGTCAAACCCTCGTAACGACCGATCTGAGTGGTC  
CGTCGTAGATGCGGCATACTTCCGCGGACTAACCCTGAAGGTACCGTCGGGTCGAACAGGAGAACCTTCTCGCA  
CTTTACCTTCTGCACCCCATCTACATGGTATTTCCGGGAGGGGAAAAGATGAGCAAACCACCATGCTTTTAACTTGG  
TGTGACCTAAGGCGGGCGATCCGTTCTGCTGTCATTGCGTAGCGGCACAGGCAGGGCACTGTCCTGGGAGGTGTTG  
ATGAATCGGAATCGTTCACCGGACATTTGGATCTGATGTTGTCCATTGTTTCGCCAGCGCGTATAGGCATATCTGT  
TCGTTTGCCTCTTGCAGTCTGGGCCACAACGTCAGTATCTCTGCCATATCAATAGCAGCCTGGTTGAATTCGTACC  
TTCAAAGTACGAGTACAGCGACCCGTCAGTGGTACTGTAGCCCTTACGACCCACCAGGCTGCTGTCCGGGTGCACT  
CTCACCAGTCTGTGGTCAGCTCCACGTCATCATTGAGCAAACCTCACAGCCGTCCTCATGTCAATGGCTTCCTGGAT  
TTTCTTCTCCCAACTTTTGTCTCTGCAGTAGATGGTCACGTCAGCGTCCGTTGGCGTCCATTGCTGTGAATAGATGGT  
TGAGGGATTGCTGCAGCCTATCTCTTCCGCCGCTGAACACTCCTGTGGACAGCAGCGGGATGGCTACGCTGCTCAG,  
.TGACAGTCTGTTACTTCCGCGGCCACTGCCCGGTAGACAGCGCCAATTCGCGGTCCCCCTCCGCTTACAGTCGTG  
GCAGAGAAATTAGCGCTACAGCGTGGATGACGGGGTACGAGCCGCACATGACTGTTTTAATTGTGCCCACTGGT  
GTTGCTGCTCCCTTAAAGGCTGACGGCCATTTCTTCCGCCACGGCCCTGCATACGCCATCCCCTACAGTTCCACGGGC  
GTTAGCTGCGTTAAACCACAGCCGCTTCTGTGCACGTGGCTATGTCTGCTCTTAACTCTGTAGGATGGTGCACACC  
CGGCCGTGTGCATGGCTTCTCCGGCATAACGGCACTCAGCTTGGTATTCATCTGGTGTAGCGTAGAGGGTCTCTTT  
CCGTTGTCAAAGTTGGAGAACAGCAAGAACAACCTTCTGTATTGCTGGTGCACAATCCGGGGCGAACACTCTTGCAG  
ACGAGAACTTTCTGCTTAAAGGAGGAAACAACGGCTTCCGCTGATTTTATCGGCGTATCCGTAAGCTCTCATCAAGAT  
GCCGCCGGGTTTTAGCAGTCGTAGCGCATCTCCCCAAGCATCTGCAGCTTCATGGCGTGGTGCACACACTGCTGG  
TAGTGGTGGATTCTGAATTCGTTGTAATGTTACAAAAGACCAAGTCGAACCTGCCGGCGTCAGCCGGCAGTCCTA  
AACTTAGGTGCTAGCACCTATCGGCGCCTGTGACATTCAGCGGTGACAACCAAGTGACCCTGCGTCGAGGCAAAG  
CCAGGTTGTACTCACTACCAGCAGGACGTGGTACCCTTACTTTATTGACCAGCCACTCAACCCTACTGCCTTAA  
ACCGTCTTGTACTCAGCCACCAGGGCGTGCGGCAGCCTGCGGTTGATAGGAATTACATTGTCCAGCACAGAAAGC  
GGTTGGATTTTTCTTCTGCGATAACTGCCTGCTTGCCCGTATGCCACTGCCCTTACAGGAAGGTATGTCTAGCTTC  
CAGCCTGGCAGCTGTTGCGGCATTGAATCCATACATCCTTCCACCAGGTCTGTTATCCCAGTGGTTGTTCTCGTAAT  
ACAGGGACACCTTCGGGGCAGAAAACAGGCCACTGTCCAGGTCAACTCCATAGTACTTGGTGCAAAATTTCAATTCAA  
GGCCACCCTGGAGAGTAAGCTCTGTCTCCTTAAATGCTGTAATTATGGTGTCTCCACTCCTCTGCTGTCAATCTGA  
TTCCGGCAGTGTCCAGGACAGGCACCAGGCTTTTCGCCAACACACGTTTCGCTTTGTTCTGGAACGCGTCCACAGG  
CGCAGCCGGTCCCTTCAATCACCTTCAATTTTTGTGCTGTTCTTCTTGCCATCTTCCAATGTGGCCGTAAAGTTACC  
CTGTGGAATGTTTATAGGACCTTAAATCCAGGATCGCCGGCCAGCGTTTTCCACACCAGCCTATCCTCAGTGCGC  
GTCAGCAGTACATTCACGTGCTCCGACGCAGGGCATAACAAGGATTTTCATTCACCTTCTGCCTTACGGCGTATA  
CCCCTTTGCGGGTGAGGCCCTGAGATGCTGCTGCTGTCATGACTTCGTGTCCACGGTAGTCCAACCTGCAGCTGCTTT  
GCCAGCCTCGGAAGCATGTTAACACGATGTCTCCTGGCTTGGGCTTGGTCTGTCTGTTGTTGTTATGATTATGGG  
TTTGTGACGGGTTGGTCTGCGCATCTTGCCTCCGTAGTGCAACGTAGACACGATGGCCGTGACTGGACGCGTG

CAACGTCTGGATATACTTTTATGACATACTTCAGTGCAGATGTTGTGGTTGAAGTTCACCTTAAGCTGCATCATATT  
GAAGAATCCGCATTGCTTGGGGTCTCCGCATAACACCACTTTGCTCCGAGGTTAACAAGAGCAATTAGGGCCAGC  
AGAGTACCGGAATGGCAAGCGAAAGCCTCGTCCACATATAGGATGTCCACGGCACGACGACACCCGTTTAGCAGG  
ATGGAGTCACTGTTTTCCCTACTTGTCCCTTCCCGCGGTGCTTCTTCACGTCGTTAACTATTCCTGGCAGTTCTCC  
TTCTTGCCGCTGGTGACCAGATCGTGTGGTACGAGGCTCTTAATAATAGCAGACTTGCCTGATCCCGGAACCC  
CAAAGACTCCTACTACTGTAGTCTTATATGGTGCCGACGGCCTGATCTTCAGCCCTTCGTAGGCGAATTCATGGAA  
CGGGGGTGGTTAGTCTCTCCACCAACACCAAACCCGACGCTTCTCTCTTGACGCAGCATTTTTTATCTACGT  
CGAACACGTACTCGGCGTCAGTTCTTTCAGCTCTGACTTCTCGTAGTTCTCCTCGTCGGTGTTCAGCGACGGTCCG  
TGAACGGCAATATGGTATAGTTTCTGTGACGAACTCCCTTTCGTTGTACACCATAGTGGCGCTCTCGCTCAAAGC  
TTGATATCGAATTCGGTGACCCTTACGCGAATCCGCTTTCAGACGTTGACTGGTCGCGTCTGGCAAAAGTTAAAGA  
CCTGACGCCCCGGCGAACTGACCGCTGAGTCTATGACGACAGCTATCTCGATGATGAAGATGCAGACTGGACTGC  
GACCGGGCAGGGGCAGAAATCTGCCGAGATAACCAGCTTACGCTGGCGTGGATGCCCGGAGAGCAGGGGCAGC  
AGGCGCTGCTGGCGTGGTTTAAATGAAGGCGATAACCCGTGCCTATAAAATCCGCTTCCCGAACGGCACGGTCGATGT  
GTTCCGTGGCTGGGTCAGCAGTATCGGTAAGGCGGTGACGGCGAAGGAAGTGATCACCCGCACGGTGAAAGTCAC  
CAATGTGGGACGTCCGTCGATGGCAGAAGATCGCAGCACGGTAACAGCGGCAACCGGCATGACCGTGACGCCTGC  
CAGCACCTCGGTGGTGAAAGGGCAGAGCACACGCTGACCGTGGCCTTCCAGCCGGAGGGCGTAACCGACAAGA  
GCTTTCGTGCGGTGTCTGCGGATAAAACAAAAGCCACCGTGTGCGGTGAGTGGTATGACCATCACCGTGAACGGCGT  
TGCTGCAGGCAAGGTCAACATTCCGGTGTATCCGGTAATGGTGAGTTTGTGCGGTTGCAGAAATTACCGTCACC  
GCCAGTTAATCCGGAGAGTCAGCGATGTTCTGAAAACCGAATCATTTGAACATAACGGTGTGACCGTCACGCTTT  
CTGAACTGTCAGCCCTGCAGCGCATTGAGCATCTCGCCCTGATGAAACGGCAGGCAGAACAGGGCGGAGTCAGACA  
GCAACCGGAAGTTTACTGTGGAAGACGCCATCAGAACCGGCGGTTTCTGGTGGCGATGTCCCTGTGGCATAACCA  
TCCGCAGAAAGACGCAGATGCCGTCCATGAATGAAGCCGTTAAACAGATTGAGCAGGAAGTGCTTACCACCTGGCC  
CACGGAGGCAATTTCTCATGCTGAAAACGTGGTGTACCGGCTGTCTGGTATGTATGAGTTTGTGGTGAATAATGCC  
CCTGAACAGACAGAGGACGCCGGGCCCCGAGAGCCTGTTTCTGCGGGAAAGTGTTTCGACGGTGAGCTGAGTTTTG  
CCCTGAAACTGGCGGTGAGATGGGGCGACCCGACTGGCGTGCCATGCTTGCCGGGATGTCATCCACGGAGTATG  
CCGACTGGCACCGCTTTTACAGTACCCATTATTTTCATGATGTTCTGCTGGATATGCACTTTTCCGGGCTGACGTAC  
ACCGTGCTCAGCCTGTTTTTCAGCGATCCGGATATGCATCCGCTGGATTTTCAGTCTGCTGAACCGGCGCGAGGCTG  
ACGAAGAGCCTGAAGATGATGTGCTGATGCAGAAAGCGGCAGGGCTTGCCGGAGGTGTCCGCTTTGGCCCCGACG  
GGAATGAAGTTATCCCCGCTTCCCGGATGTGGCGGACATGACGGAGGATGACGTAATGCTGATGACAGTATCAG  
AAGGGATCGCAGGAGGAGTCCGGTATGGCTGAACCGGTAGGCGATCTGGTCGTTGATTTGAGTCTGGATGCGGCC  
AGATTTGACGAGCAGATGGCCAGAGTCAGGCGTCATTTTTCTGGTACGGAAAGTGATGCGAAAAAACAGCGGCA  
GTCGTTGAACAGTTCGCTGAGCCGACAGGCGCTGGCTGCACAGAAAGCGGGGATTTCCGTCGGGCAGTATAAAGCC  
GCCATGCGTATGCTGCCTGCACAGTTCACCGACGTGGCCACGCAGCTTGCAGGCGGGCAAAGTCCGTGGCTGATCC  
TGCTGCAACAGGGGGGGCAGGTGAAGGACTCCTTCCGCGGGATGATCCCATGTTACGGGGGCTTGCCGGTGCGA  
TCACCCTGCCGATGGTGGGGGCCACCTCGTGGCGGTGGCGACCGGTGCGCTGGCGTATGCCTGGTATCAGGGCA  
ACTCAACCCTGTCCGATTTCAACAAAACGCTGGTCTTTCCGGCAATCAGGCGGGACTGACGGCAGATCGTATGCT  
GGTCTGTCCAGAGCCGGCAGGCGGCAGGGCTGACGTTTAAACCAGACCAGCGAGTCACTCAGCGCACTGGTTAA  
GGCGGGGTAAGCGGTGAGGCTCAGATTGCGTCCATCAGCCAGAGTGTGGCGGTTTCTCCTCTGCATCCGGCGTG  
GAGGTGGACAAGGTGCTGAAGCCTCTAGAAGTTTCAAGGAAGCGGTGATGCTGATAGAAGCCGGACTGAGTACCTA  
CGAGAAAGAGTGCAGAAAACGCGGTGACGACTATCAGGAAATTTTTGCCAGCAGGTCCGTGAAACGATGGAGCG  
CCGTGCAGCCGTTTAAACCGCCCGCTGGGCGGCTGCAGCATTTGAATCCGGGCTGCGACAATCAACAGAGGA

GGAGAAGAGTGACAGCAGAGCTGCGTAATCTCCGCATATTGCCAGCATGGCCTTTAATGAGCCGCTGATGCTTGA  
ACCCGCCTATGCGCGGGTTTTCTTTTGTGCGCTTGCAGGCCAGCTTGGGATCAGCAGCCTGACGGATGCGGTGCC  
GGCGACAGCCTGACTGCCAGGAGGCACTCGCGACGCTGGCATTATCCGGTGATGATGACGGACCACGACAGGCC  
CGCAGTTATCAGGTCATGAACGGCATCGCCGTGCTGCCGGTGTCCGGCACGCTGGTCAGCCGGACGCGGGCGCTG  
CAGCCGTAICTCGGGATGACCGGTTACAACGGCATTATCGCCCGTCTGCAACAGGCTGCCAGCGATCCGATGGTG  
GACGGCATTCTGCTCGATATGGACACGCCCCGGCGGGATGGTGGCGGGGGCATTGACTGCGCTGACATCATCGCC  
CGTGTGCGTGACATAAAACCGGTATGGGCGCTTGCCAACGACATGAACTGCAGTGCAGGTCAGTTGCTTGCCAGTG  
CCGCCTCCCGGCGTCTGGTCACGCAGACCGCCCGGACAGGCTCCATCGGCGTCATGATGGCTCACAGTAATTACGG  
TGCTGCGCTGGAGAAACAGGGTGTGGAAATCACGCTGATTTACAGCGGCAGCCATAAGGTGGATGGCAACCCCTA  
CAGCCATCTTCCGGATGACGTCCGGGAGACACTGCAGTCCCGGATGGACGCAACCCGCCAGATGTTTGCAGAA  
GGTGTGCGCATATACCGGCTGTCCGTGCAGGTTGTGCTGGATACCGAGGCTGCAGTGTACAGCGGTCAGGAGGC  
CATTGATGCCGACTGGCTGATGAACTTGTTAACAGCACCGATGCGATCACCGTCATGCGTGATGCACTGGATGCA  
CGTAAATCCCGTCTCTCAGGAGGGCGAATGACCAAAGAGACTCAATCAACAAGTGTTCAGCCACTGCTTCGCAG  
GCTGACGTTACTGACGTGGTGCACGACGGAGGGCGAGAACGCCAGCGCGGCGCAGCCGGACGTGAACGCGCA  
GATCACCGCAGCGGTTGCGGCAGAAAACAGCCGCATTATGGGGATCCTCAACTGTGAGGAGGCTCACGGACGCGA  
AGAACAGGCACGCGTGTGCGCAGAAAACCCCGGTATGACCGTGAAAACGGCCCCGCCGATTCTGGCCGCAGCACC  
ACAGAGTGACAGGCGCGCAGTGACACTGCGCTGGATCGTCTGATGCAGGGGGCACCGGCACCGCTGGCTGCAGG  
TAACCCGGCATCTGATGCCGTTAACGATTTGCTGAACACACCAGTGTAAAGGGATGTTTATGACGAGCAAAGAAAC  
CTTTACCCATTACCAGCCGACGGCAACAGTGACCCGGCTCATACCGCAACCGCGCCCGGCGGATTGAGTGCGAA  
AGCGCCTGCAATGACCCCGCTGATGCTGGACACCTCCAGCCGTAAGCTGGTTGCGTGGGATGGCACCACCGACGG  
TGCTGCCGTTGGCATTCTTGCAGTTGCTGCTGACCAGACCAGCACCACGCTGACGTTCTACAAGTCCGGCACGTT  
CGTTATGAGGATGTGCTCTGGCCGGAGGCTGCCAGCGACGAGACGAAAAACGGACCGGCTTTGCCGGAACGGCA  
ATCAGCATCGTTAACTTTACCCTTCATCACTAAAGGCCGCTGTGCGGCTTTTTTTACGGGATTTTTTTATGTCGAT  
GTACACAACCGCCCAAGAGCTCCAGCTTTTGTCCCTTTAGTGAGGGTTAATTGCGCGCTTGGCGTAATCATGGTC  
ATAGCTGTTTCTGTGTGAAATTGTTATCCGCTCACAATTCCACACAACATACGAGCCGGAAGCATAAAGTGTA  
GCCTGGGGTGCTAATGAGTGAGCTAACTCACATTAATTGCGTTGCGCTCACTGCCCGCTTTCCAGTCGGGAAACC  
TGTCGTGCCAGCTGCATTAATGAATCGGCCAACGCGCGGGGAGAGGCGGTTTGCCTATTGGGCGCTCTTCCGCTC  
CTCGCTCACTGACTCGCTGCGCTCGGTCGTTCCGGCTGCGGCGAGCGGTATCAGCTCACTCAAAGGCGGTAATACGG  
TTATCCACAGAATCAGGGGATAACGCAGGAAAGAA-(Ligation site for the 500 bp-long DBCO labeled DNA)

### **Sequence of the centromeric DNA (cenDNA)**

(Ligation site for the biotin labeled DNA fragment)-

GTGCTGGAATTCGCCCTTCATCACAAAGAAGTTTCTGAGAATGCTTCTGTCTAGTTTTTATACGAAGATATCCCTT  
TTCTGCCTTTGACCCCAAAGCGCTTGAATCTCCACTTGCAAATTCACAAAAACAGTGTTCAAATCTGCTCTCTC  
TAAATGAAAGTTCAACTCTGTCAGTTGAATACACTCAACACAAGGAAGTTACTGAGAATTTCTGTCTAGCATAA  
TATGAAGAAATCCCGTTTCCAACGAAGGCCTCAAAGGGGTCTGAATATCCACTTGCAGACTTTATAAACAGAGTGT  
TTACTAACTGCTCTATGAAAAGAAACGTTAACTCTGTGAGTTGAACACACACATCACAAAGGAGTTTCTGAGAAT  
CATTCTGTCTAGTTTTTCTACGAAGATATTTCTTTTCTACTATTGACCTGAAAGCAGCTGAAATCTCCACTTGCAA

ATTCCACAAAAAGAGTGTTC AAGTCTGCTCTGTGTAAAGGATCGTTCAACTCTGTGAGTTGAATACACACAACAC  
AAGGAAGTACTGAGAATTCTTCTCTCTAGCAGAATATGAAGAAATCCCGTTTCCAACGAAGGCCTCAAAGAGGTC  
TGAATATCCACTTGACAGACTTTACAAACAGAGTGTTCCTAACTGCTCTATGAAAAGGAAGGTTCAACTCTGTGAG  
TTGAATGCAAAGGGCGAATTCTGCAGACGCTGTGCTGGAATTCGCCCTTCATCACAAAGAAGTTTCTGAGAATGCT  
TCTGTCTAGTTTTTATACGAAGATATTCCTTTTCTGCCTTTGACCCCAAAGCGCTTGAAATCTCCACTTGCAAATTC  
CACAAAAACAGTGTTC AATCTGCTCTCTCTAAATGAAAGTTCAACTCTGTCAGTTGAATACACTCAACACAAGG  
AAGTTACTGAGAATCTTCTGTCTAGCATAATATGAAGAAATCCCGTTTCCAACGAAGGCCTCAAAGGGGTCTGAA  
TATCCACTTGACAGACTTTATAAACAGAGTGTTTACTAACTGCTCTATGAAAAGAAACGTTAAACTCTGTGAGTTGA  
ACACACACATCACAAAGGAGTTTCTGAGAATCATTCTGTCTAGTTTTTCTACGAAGATATTCCTTTTCTACTATTG  
ACCTGAAAAGCAGCTGAAATCTCCACTTGCAAATTCACAAAAAGAGTGTTC AAGTCTGCTCTGTGTAAAGGATCG  
TTCAACTCTGTGAGTTGAATACACACAACACAAGGAAGTTACTGAGAATCTTCTCTCTAGCAGAATATGAAGAAA  
TCCCGTTTCCAACGAAGGCCTCAAAGAGGTCTGAATATCCACTTGACAGACTTTACAAACAGAGTGTTCCTAACTG  
CTCTATGAAAAGGAAGGTTCAACTCTGTGAGTTGAATGCAAAGGGCGAATTCTGCAGAGCGTGTGCTGGAATTCG  
CCCTTCATCACAAAGAAGTTTCTGAGAATGCTTCTGTCTAGTTTTTATACGAAGATATTCCTTTTCTGCCTTTGACC  
CCAAAGCGCTTGAAATCTCCACTTGCAAATTCACAAAAACAGTGTTC AATCTGCTCTCTCTAAATGAAAGTTC  
AACTCTGTCAGTTGAATACACTCAACACAAGGAAGTTACTGAGAATCTTCTGTCTAGCATAATATGAAGAAATCC  
CGTTTCCAACGAAGGCCTCAAAGGGGTCTGAATATCCACTTGACAGACTTTATAAACAGAGTGTTTACTAACTGCTC  
TATGAAAAGAAACGTTAAACTCTGTGAGTTGAACACACACATCACAAAGGAGTTTCTGAGAATCATTCTGTCTAGT  
TTTTCTACGAAGATATTCCTTTTCTACTATTGACCTGAAAGCAGCTGAAATCTCCACTTGCAAATTCACAAAAAG  
AGTGTTC AAGTCTGCTCTGTGTAAAGGATCGTTCAACTCTGTGAGTTGAATACACACAACACAAGGAAGTTACTG  
AGAATCTTCTCTCTAGCAGAATATGAAGAAATCCCGTTTCCAACGAAGGCCTCAAAGAGGTCTGAATATCCACTT  
GCAGACTTTACAAACAGAGTGTTCCTAACTGCTCTATGAAAAGGAAGGTTCAACTCTGTGAGTTGAATGCAAAGG  
GCGAATTCTGCAGAGTATGTGTGCTGGAATTCGCCCTTCATCACAAAGAAGTTTCTGAGAATGCTTCTGTCTAGTTT  
TTATACGAAGATATTCCTTTTCTGCCTTTGACCCCAAAGCGCTTGAAATCTCCACTTGCAAATTCACAAAAACAG  
TGTTTCAAATCTGCTCTCTCTAAATGAAAGTTCAACTCTGTCAGTTGAATACACTCAACACAAGGAAGTTACTGAG  
AATTCTTCTGTCTAGCATAATATGAAGAAATCCCGTTTCCAACGAAGGCCTCAAAGGGGTCTGAATATCCACTTGC  
AGACTTTATAAACAGAGTGTTTACTAACTGCTCTATGAAAAGAAACGTTAAACTCTGTGAGTTGAACACACACATC  
ACAAAGGAGTTTCTGAGAATCATTCTGTCTAGTTTTTCTACGAAGATATTCCTTTTCTACTATTGACCTGAAAGCA  
GCTGAAATCTCCACTTGCAAATTCACAAAAAGAGTGTTC AAGTCTGCTCTGTGTAAAGGATCGTTCAACTCTGT  
GAGTTGAATACACACAACACAAGGAAGTTACTGAGAATCTTCTCTCTAGCAGAATATGAAGAAATCCCGTTTCCA  
ACGAAGGCCTCAAAGAGGTCTGAATATCCACTTGACAGACTTTACAAACAGAGTGTTCCTAACTGCTCTATGAAA  
GGAAGGTTCAACTCTGTGAGTTGAATGCAAAGGGCGAATTCTGCAGATTGAGTGTGCTGGAATTCGCCCTTCATCA  
CAAAGAAGTTTCTGAGAATGCTTCTGTCTAGTTTTTATACGAAGATATTCCTTTTCTGCCTTTGACCCCAAAGCGC  
TTGAAATCTCCACTTGCAAATTCACAAAAACAGTGTTC AATCTGCTCTCTCTAAATGAAAGTTCAACTCTGTCA  
GTTGAATACACTCAACACAAGGAAGTTACTGAGAATCTTCTGTCTAGCATAATATGAAGAAATCCCGTTTCCAAC  
GAAGGCCTCAAAGGGGTCTGAATATCCACTTGACAGACTTTATAAACAGAGTGTTTACTAACTGCTCTATGAAAAGA  
AACGTTAAACTCTGTGAGTTGAACACACACATCACAAAGGAGTTTCTGAGAATCATTCTGTCTAGTTTTTCTACGA  
AGATATTCCTTTTCTACTATTGACCTGAAAGCAGCTGAAATCTCCACTTGCAAATTCACAAAAAGAGTGTTC A  
GTCTGCTCTGTGTAAAGGATCGTTCAACTCTGTGAGTTGAATACACACAACACAAGGAAGTTACTGAGAATCTTCT  
TCTCTAGCAGAATATGAAGAAATCCCGTTTCCAACGAAGGCCTCAAAGAGGTCTGAATATCCACTTGACAGACTTTA

CAAACAGAGTGTTTCCTAACTGCTCTATGAAAAGGAAGGTTCAACTCTGTGAGTTGAATGCAAAGGGCGAATTCTG  
CAGA-(Ligation site for the DBCO labeled DNA fragments)

### **Sequence of the biotin-labeled DNA fragment**

(This fragment is made by PCR amplification with biotin-dUTP)

GACCGAGATAGGGTTGAGTGTGTTCCAGTTTGAACAAGAGTCCACTATTAAGAACGTGGACTCCAACGTCAA  
AGGGCGAAAACCGTCTATCAGGGCGATGGCCCACTACGTGAACCATCACCTAATCAAGTTTTTGGGGTTCGAG  
GTGCCGTAAAGCACTAAATCGGAACCCTAAAGGGAGCCCCGATTTAGAGCTTGACGGGAAAGCCGGCGAACGT  
GGCGAGAAAGGAAGGGAAGAAAGCGAAAGGAGCGGGCGCTAGGGCGCTGGCAAGTGTAGCGGTCACGCTGCGCG  
TAACCACACACCCGCGCTTAATGCGCCGCTACAGGGCGCGTCCCATTCGCCATTCAGGCTGCGCAACTGTTG  
GGAAGGGCGATCGGTGCGGGCCTCTTCGCTATTACGCCAGCTGGCGAAAGGGGGATGTGCTGCAAGGCGATTAAG  
TTGGGTAACGCCAGCTGG (Ligation site for the random/cenDNA fragment)

### **Sequence of the DBCO-labeled DNA fragment**

(This fragment is made by PCR amplification with DBCO-dUTP)

(Ligation site for the random/cenDNA fragment)-

CCTACTGGCGTTACCCAACCTAATCGCCTTGACGACATCCCCCTTTCGCCAGCTGGCGTAATAGCGAAGAGGCC  
GCACCGATCGCCCTTCCCAACAGTTGCGCAGCCTGAATGGCGAATGGGACGCGCCCTGTAGCGGCGCATTAAAGCG  
CGGCGGGTGTGGTGGTTACGCGCAGCGTGACCGCTACACTTGCCAGCGCCCTAGCGCCCGTCCCTTTCGCTTTCTTC  
CCTTCCTTTCGCCACGTTGCGCCGGCTTCCCCGTCAAGCTCTAAATCGGGGGCTCCCTTTAGGGTTCCGATTTAG  
TGCTTTACGGCACCTCGACCCCAAAAACCTTGATTAGGGTGATGGTTCACGTAGTGGCCATCGCCCTGATAGACG  
GTTTTTCGCCCTTTGACGTTGGAGTCCACGTTCTTAATAGTGGACTCTTGTTCCAAACCTGGAACAACACTCAACCC  
TATCTCGGTC
